# Supplementary material
Source: publisher figshare collection journal article supplement (https://acs.figshare.com/ndownloader/files/3882358)

# Diastereoselective Attack on Chiral-at-Metal Ruthenium Allenylidene Complexes to Give Alkynyl Complexes

Matthew J. Queensen,<sup>a</sup> Nigam P. Rath,<sup>a,b</sup> Eike B. Bauer\*<sup>a</sup>

<sup>a</sup> University of Missouri - St. Louis, Department of Chemistry and Biochemistry, One University Boulevard, St. Louis, MO 63121, USA. Tel.: +1-314-516- 5311; Fax: +1-314-516-5342. [bauere@umsl.edu](mailto:bauere@umsl.edu)

<sup>b</sup> Center for Nanoscience, University of Missouri - St. Louis, St. Louis, MO, 63121, USA.

## Supporting Information

|                                                                                                                                                                  |   |
|------------------------------------------------------------------------------------------------------------------------------------------------------------------|---|
| 1. Spectroscopic data for the generation of complex ( $R_{Ru}, R_{ax}$ )- <b>13</b>                                                                              | 2 |
| 2. Table S1 (Crystallographic Parameters)                                                                                                                        | 4 |
| 3. UV-vis spectra of selected complexes                                                                                                                          | 5 |
| 4. $^{31}P\{^1H\}$ NMR of ( $R_{Ru}, R_{ax}$ )- <b>18</b> (top) and ( $R_{Ru}, R_{ax}$ )- <b>20</b><br>(bottom) for the determination of diastereomeric excesses | 6 |
| 5. $^1H$ and $^{13}C\{^1H\}$ NMR spectra of the new complexes                                                                                                    | 7 |

# 1. Experimental and spectroscopic data for the generation of the enynyl complex ( $R_{Ru}, R_{ax}$ )-**13**

The reaction between ( $R_{Ru}, R_{ax}$ )-**12** and 1-phenylethenolate did not result in a nucleophilic attack at the  $C_\gamma$  atom, but resulted mainly in deprotonation of the methyl group to give the neutral enynyl complex ( $R_{Ru}, R_{ax}$ )-**13** (Scheme S1).

**Scheme S1.** Enynyl formation.

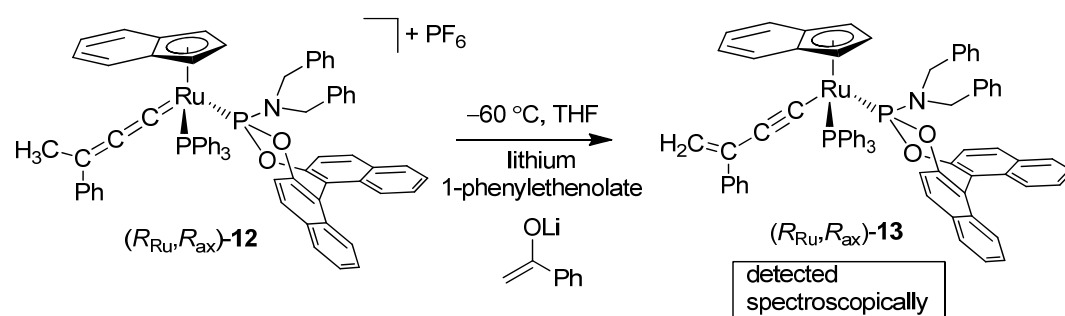

The complex could not be isolated spectroscopically pure; the isolated material contained other, unidentified material. However, key NMR and IR data in addition to the FAB-MS of the crude material established the formation of ( $R_{Ru}, R_{ax}$ )-**13**. The terminal  $=CH_2$  unit gave two signals at 5.29 and 4.93 ppm in the  $^1H$  NMR and a diagnostic signal at 110.2 ppm in the  $^{13}C\{^1H\}$  NMR in addition to signals at 113.6 and 112.1 ppm for the  $Ru-C\equiv C$  carbon atoms. Also, bands at  $2069\text{ cm}^{-1}$  and  $2034\text{ cm}^{-1}$  were observed in the IR, while the band around  $1950\text{ cm}^{-1}$  diagnostic for allenylidene complexes has disappeared. These spectroscopic data closely resemble those of previously synthesized enynyl complexes. It has previously been reported that hydrogens on carbon atoms in a position alpha to the  $C_\gamma$  atom of the allenylidene chain can be considerably acidic. Such protons can be removed by bases as weak as  $K_2CO_3$ , as shown for an allenylidene

complex  $[\text{Ru}(\text{Ind})(\text{PPh}_3)_2=\text{C}=\text{C}=\text{C}(\text{CH}_2)\text{R}]^+$  which gave upon deprotonation an enynyl complex (R denotes a cyclic steroid backbone, of which the  $\text{CH}_2$  group is a member).

**Generation of  $(R_{\text{Ru}}, R_{\text{ax}})$ -[Ru(Ind)(PPh<sub>3</sub>)(6){C≡C-C=(CH<sub>2</sub>)Ph}]<sup>+</sup> PF<sub>6</sub><sup>−</sup> [(R<sub>Ru</sub>, R<sub>ax</sub>)-13].** A two neck round bottom flask was charged with acetophenone (0.277 g, 2.31 mmol) and THF (2 mL). The flask was then cooled to −60 °C followed by the rapid addition of freshly titrated LDA (5 mL, 0.46 M) and the solution was stirred at −60 °C for two hours and then warmed to room temperature. To a separate Schlenk tube was added  $(R_{\text{Ru}}, R_{\text{ax}})$ -[Ru(Ind)(PPh<sub>3</sub>)(6){C=C=C(CH<sub>3</sub>)Ph}]<sup>+</sup> PF<sub>6</sub><sup>−</sup> (0.232 g, 0.228 mmol) and THF (10 mL) and the solution was cooled to −60 °C for 10 minutes followed by the dropwise addition of the prepared acetophenone enolate (0.801 mL, 0.329 M, 0.341 mmol) over the course of 7 minutes. The solution was stirred at −60 °C for 2 hours and at room temperature for 2 hours. The solvent was removed by oil pump vacuum to yield the crude solid as a mixture of alkynyl-vinylidene and enolate attack products. The crude solid was purified by flash column chromatography (2 × 30 cm silica column, eluted with 2:1 v/v CH<sub>2</sub>Cl<sub>2</sub>/diethyl ether) to yield  $(R_{\text{Ru}}, R_{\text{ax}})$ -13 as impure orange solid (0.129 g, 0.094 mmol, 42 %). Key NMR assignment data (δ, CDCl<sub>3</sub>): <sup>1</sup>H 5.29 (s, 1H, C=CH), 4.93 (s, 1H, C=CH). <sup>13</sup>C {<sup>1</sup>H}: 113.6 (s, C<sub>ω</sub>), 112.1 (s, C<sub>β</sub>), 110.2 (s, PhC=CH<sub>2</sub>). <sup>31</sup>P {<sup>1</sup>H}: 177.98 (d, <sup>3</sup>J<sub>PP</sub>=124.7 Hz, (R)-6), 55.55 (d, <sup>3</sup>J<sub>PP</sub>=123.9 Hz, PPh<sub>3</sub>). IR (cm<sup>−1</sup>, ATR): 3428(m), 3056(w), 2069(s), 2034(s), 1683(m), 1590(m), 1464(s), 1433(s), 1325(s), 1229(s), 1092(s), 952(s), 822(s), 743(s), 693(s). MS (FAB): 1116 ([ $(R_{\text{Ru}}, R_{\text{ax}})$ -13]<sup>+</sup>, 35%), 988 ([ $(R_{\text{Ru}}, R_{\text{ax}})$ -13 − C≡C-PhC=CH<sub>2</sub>]<sup>+</sup>, 10%), 854 ([ $(R_{\text{Ru}}, R_{\text{ax}})$ -13 − PPh<sub>3</sub>]<sup>+</sup>, 60%).

## 2. Table S1 (Crystallographic Parameters)

|                                                          | $[(R_{Ru}, R_{ax})\text{-11}]^+PF_6^- \cdot CH_2Cl_2$                                   | $(R_{Ru}, R_{ax})\text{-17} \cdot \text{toluene}$                     |
|----------------------------------------------------------|-----------------------------------------------------------------------------------------|-----------------------------------------------------------------------|
| Empirical formula                                        | $C_{79}H_{66}Cl_2F_6NO_2P_3Ru$                                                          | $C_{91}H_{73}NO_3P_2Ru$                                               |
| Formula weight                                           | 1440.20                                                                                 | 1391.51                                                               |
| Temperature                                              | 100(2) K                                                                                | 100(2) K                                                              |
| Wavelength                                               | 0.71073 Å                                                                               | 0.71073 Å                                                             |
| Crystal system                                           | Triclinic                                                                               | Orthorhombic                                                          |
| Space group                                              | P1                                                                                      | $P2_12_12_1$                                                          |
| Unit cell dimensions a, b, c [Å]                         | a = 11.1558(9) Å<br>b = 11.8706(8) Å<br>c = 14.5713(11) Å                               | a = 14.1888(4) Å<br>b = 17.6625(5) Å<br>c = 29.0539(9) Å              |
| Unit cell dimensions $\alpha$ , $\beta$ , $\gamma$ [deg] | $\alpha = 110.713(4)^\circ$<br>$\beta = 96.502(4)^\circ$<br>$\gamma = 107.918(4)^\circ$ | $\alpha = 90^\circ$<br>$\beta = 90^\circ$<br>$\gamma = 90^\circ$      |
| Volume / Z                                               | 1663.0(2) Å <sup>3</sup> / 1                                                            | 7281.2(4) Å <sup>3</sup> / 4                                          |
| Density (calculated)                                     | 1.438 Mg/m <sup>3</sup>                                                                 | 1.269 Mg/m <sup>3</sup>                                               |
| Absorption coefficient                                   | 0.455 mm <sup>-1</sup>                                                                  | 0.311 mm <sup>-1</sup>                                                |
| F(000)                                                   | 740                                                                                     | 2896                                                                  |
| Crystal size / mm <sup>3</sup>                           | 0.219 × 0.187 × 0.059                                                                   | 0.432 × 0.174 × 0.079                                                 |
| Theta range for data collection                          | 1.945 to 28.356°                                                                        | 1.597 to 27.117°                                                      |
| Index ranges                                             | $-14 \leq h \leq 14$ , $-15 \leq k \leq 15$ ,<br>$-19 \leq l \leq 19$                   | $-18 \leq h \leq 18$ , $-14 \leq k \leq 22$ ,<br>$-37 \leq l \leq 37$ |
| Reflections collected                                    | 38508                                                                                   | 148862                                                                |
| Independent reflections                                  | 15431 [R(int) = 0.0424]                                                                 | 16056 [R(int) = 0.0715]                                               |
| Completeness to theta = 25.242°                          | 99.9 %                                                                                  | 99.8 %                                                                |
| Absorption correction                                    | Semi-empirical from equivalents                                                         | Semi-empirical from equivalents                                       |
| Max. and min. transmission                               | 0.8621 and 0.7834                                                                       | 0.9281 and 0.8579                                                     |
| Refinement method                                        | Full-matrix least-squares on F <sup>2</sup>                                             | Full-matrix least-squares on F <sup>2</sup>                           |
| Data / restraints / parameters                           | 15431 / 589 / 798                                                                       | 16056 / 140 / 822                                                     |
| Goodness-of-fit on F2                                    | 1.024                                                                                   | 1.050                                                                 |
| Final R indices [I > 2sigma(I)]                          | R1 = 0.0477, wR2 = 0.1098                                                               | R1 = 0.0438, wR2 = 0.1142                                             |
| R indices (all data)                                     | R1 = 0.0550, wR2 = 0.1149                                                               | R1 = 0.0545, wR2 = 0.1222                                             |
| Absolute structure parameter                             | -0.032(11)                                                                              | -0.010(8)                                                             |
| Extinction coefficient                                   | n/a                                                                                     | n/a                                                                   |
| Largest diff. peak and hole                              | 0.726 and -0.769 e.Å <sup>-3</sup>                                                      | 0.964 and -0.416 e.Å <sup>-3</sup>                                    |

### 3. UV-vis spectra of selected complexes

( $R_{Ru}, R_{ax}$ )-**11** (blue)

( $R_{Ru}, R_{ax}$ )-**18** (orange)

( $R_{Ru}, R_{ax}$ )-**19** (yellow)

( $R_{Ru}, R_{ax}$ )-**20** (grey)

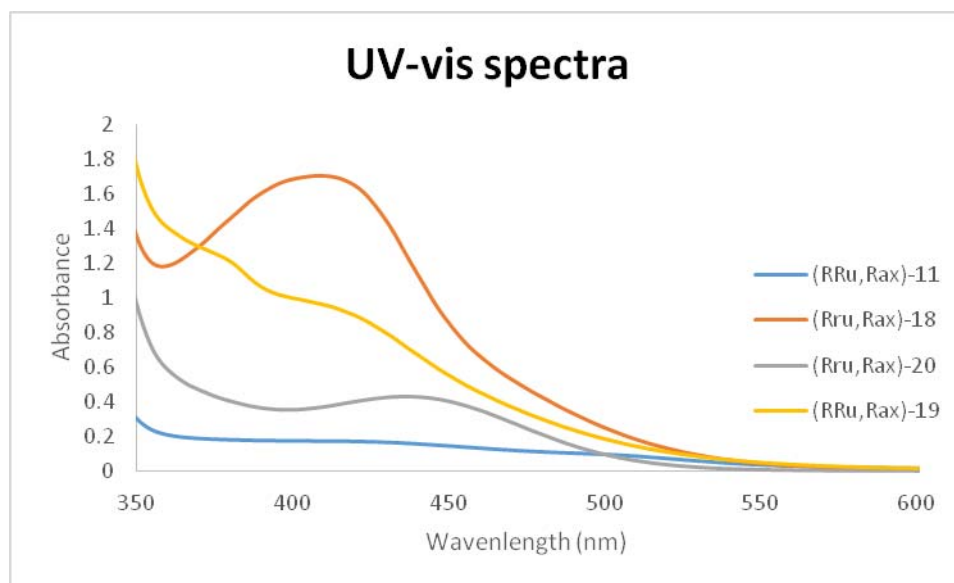

#### 4. $^{31}\text{P}\{^1\text{H}\}$ NMR complexes for the determination of diastereomeric excesses

Integration of the  $^{31}\text{P}\{^1\text{H}\}$  NMR spectra of ( $R_{\text{Ru}}, R_{\text{ax}}$ )-**18** (top) and ( $R_{\text{Ru}}, R_{\text{ax}}$ )-**20** (bottom) for the determination of enantiomeric excesses.

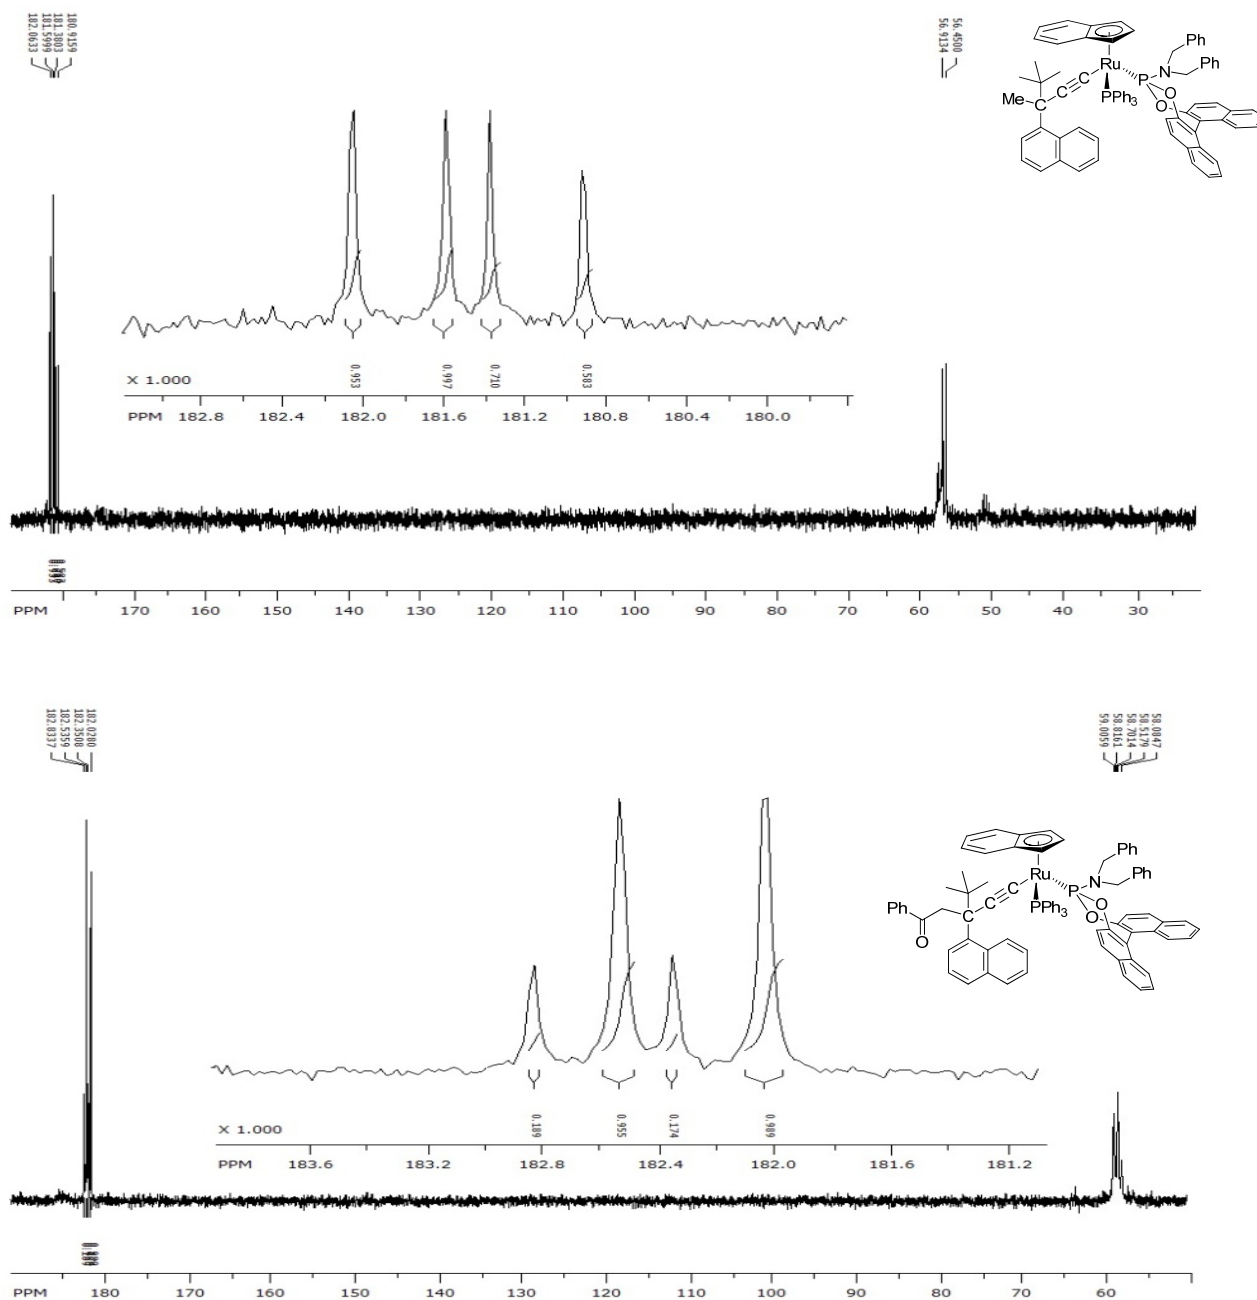

$^1\text{H}$  and  $^{13}\text{C}\{^1\text{H}\}$  NMR spectra of  $(R_{\text{Ru}}, R_{\text{ax}})\text{-[Ru(Ind)(PPh}_3\text{)(6)\{=C=C=C}(t\text{-Bu)(2-naphthyl)\}^+\text{PF}_6^-]$ ,  $[(R_{\text{Ru}}, R_{\text{ax}})\text{-11}]$

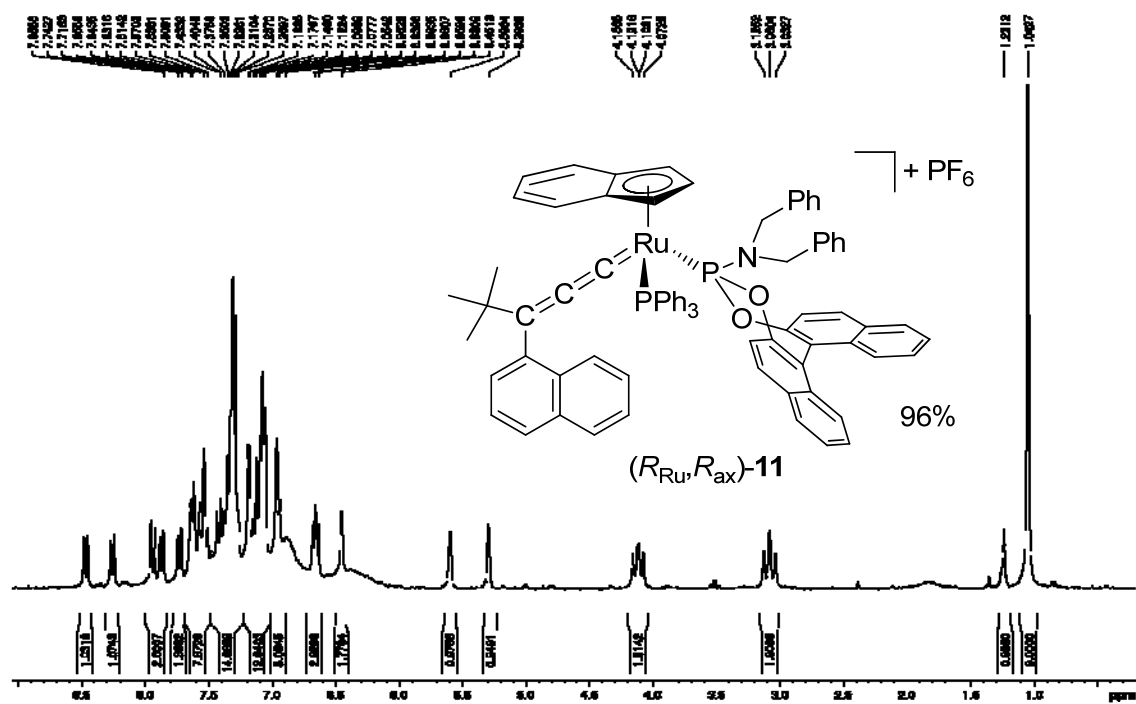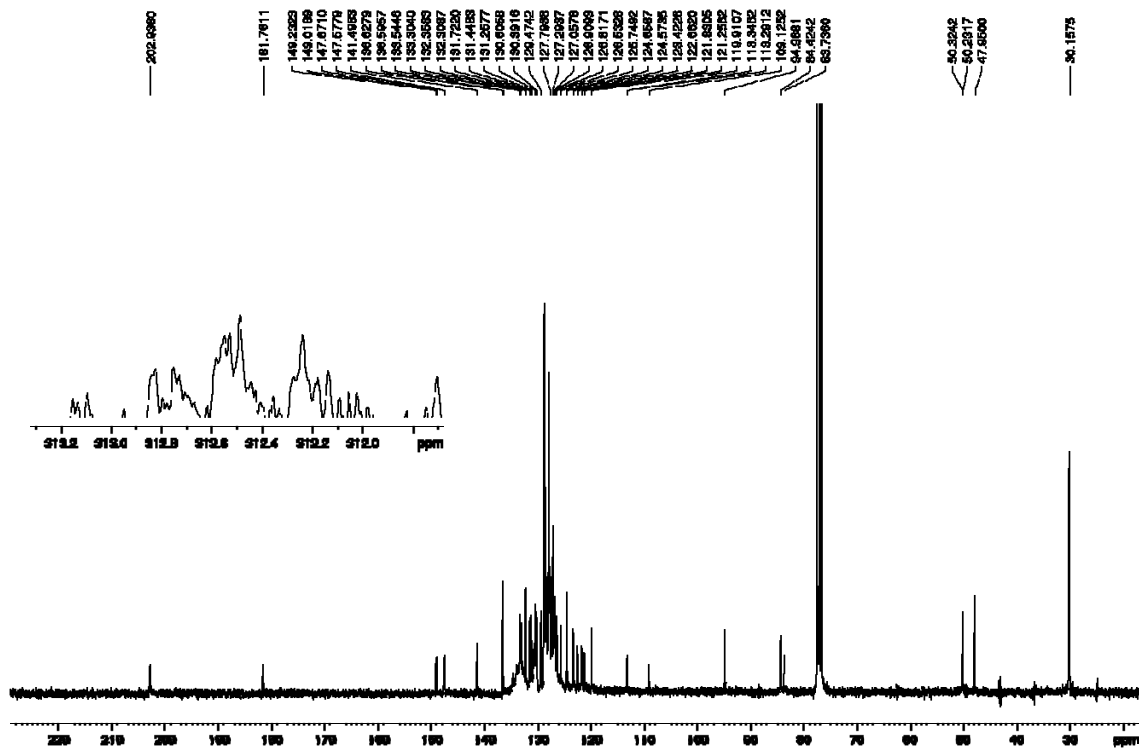

**[( $R_{Ru}$ ,  $R_{ax}$ )-14]**

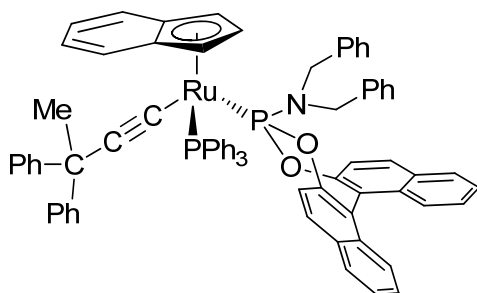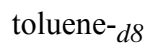

Chemical structure of the complex:

CCCC#CC(c1ccccc1)(c2ccccc2)[Ru]1C=CC=CC=C1[P+](c2ccccc2)(c2ccccc2)N(c2ccccc2)C(c2ccccc2)C2C3C=CC=CC=C3C2OC4C=CC=CC=C4OC5C=CC=CC=C5C6C=CC=CC=C6

<sup>1</sup>H NMR spectrum (CDCl<sub>3</sub>) showing peaks from 0 to 8 ppm. The spectrum includes integration values below the baseline and chemical shift values above the peaks.

Chemical shift values (ppm): 7.4598, 7.4644, 7.4765, 7.5219, 7.5765, 7.5820, 7.5920, 7.6020, 7.6120, 7.6220, 7.6320, 7.6420, 7.6520, 7.6620, 7.6720, 7.6820, 7.6920, 7.7020, 7.7120, 7.7220, 7.7320, 7.7420, 7.7520, 7.7620, 7.7720, 7.7820, 7.7920, 7.8020, 7.8120, 7.8220, 7.8320, 7.8420, 7.8520, 7.8620, 7.8720, 7.8820, 7.8920, 7.9020, 7.9120, 7.9220, 7.9320, 7.9420, 7.9520, 7.9620, 7.9720, 7.9820, 7.9920, 8.0020, 8.0120, 8.0220, 8.0320, 8.0420, 8.0520, 8.0620, 8.0720, 8.0820, 8.0920, 8.1020, 8.1120, 8.1220, 8.1320, 8.1420, 8.1520, 8.1620, 8.1720, 8.1820, 8.1920, 8.2020, 8.2120, 8.2220, 8.2320, 8.2420, 8.2520, 8.2620, 8.2720, 8.2820, 8.2920, 8.3020, 8.3120, 8.3220, 8.3320, 8.3420, 8.3520, 8.3620, 8.3720, 8.3820, 8.3920, 8.4020, 8.4120, 8.4220, 8.4320, 8.4420, 8.4520, 8.4620, 8.4720, 8.4820, 8.4920, 8.5020, 8.5120, 8.5220, 8.5320, 8.5420, 8.5520, 8.5620, 8.5720, 8.5820, 8.5920, 8.6020, 8.6120, 8.6220, 8.6320, 8.6420, 8.6520, 8.6620, 8.6720, 8.6820, 8.6920, 8.7020, 8.7120, 8.7220, 8.7320, 8.7420, 8.7520, 8.7620, 8.7720, 8.7820, 8.7920, 8.8020, 8.8120, 8.8220, 8.8320, 8.8420, 8.8520, 8.8620, 8.8720, 8.8820, 8.8920, 8.9020, 8.9120, 8.9220, 8.9320, 8.9420, 8.9520, 8.9620, 8.9720, 8.9820, 8.9920, 9.0020, 9.0120, 9.0220, 9.0320, 9.0420, 9.0520, 9.0620, 9.0720, 9.0820, 9.0920, 9.1020, 9.1120, 9.1220, 9.1320, 9.1420, 9.1520, 9.1620, 9.1720, 9.1820, 9.1920, 9.2020, 9.2120, 9.2220, 9.2320, 9.2420, 9.2520, 9.2620, 9.2720, 9.2820, 9.2920, 9.3020, 9.3120, 9.3220, 9.3320, 9.3420, 9.3520, 9.3620, 9.3720, 9.3820, 9.3920, 9.4020, 9.4120, 9.4220, 9.4320, 9.4420, 9.4520, 9.4620, 9.4720, 9.4820, 9.4920, 9.5020, 9.5120, 9.5220, 9.5320, 9.5420, 9.5520, 9.5620, 9.5720, 9.5820, 9.5920, 9.6020, 9.6120, 9.6220, 9.6320, 9.6420, 9.6520, 9.6620, 9.6720, 9.6820, 9.6920, 9.7020, 9.7120, 9.7220, 9.7320, 9.7420, 9.7520, 9.7620, 9.7720, 9.7820, 9.7920, 9.8020, 9.8120, 9.8220, 9.8320, 9.8420, 9.8520, 9.8620, 9.8720, 9.8820, 9.8920, 9.9020, 9.9120, 9.9220, 9.9320, 9.9420, 9.9520, 9.9620, 9.9720, 9.9820, 9.9920, 10.0020, 10.0120, 10.0220, 10.0320, 10.0420, 10.0520, 10.0620, 10.0720, 10.0820, 10.0920, 10.1020, 10.1120, 10.1220, 10.1320, 10.1420, 10.1520, 10.1620, 10.1720, 10.1820, 10.1920, 10.2020, 10.2120, 10.2220, 10.2320, 10.2420, 10.2520, 10.2620, 10.2720, 10.2820, 10.2920, 10.3020, 10.3120, 10.3220, 10.3320, 10.3420, 10.3520, 10.3620, 10.3720, 10.3820, 10.3920, 10.4020, 10.4120, 10.4220, 10.4320, 10.4420, 10.4520, 10.4620, 10.4720, 10.4820, 10.4920, 10.5020, 10.5120, 10.5220, 10.5320, 10.5420, 10.5520, 10.5620, 10.5720, 10.5820, 10.5920, 10.6020, 10.6120, 10.6220, 10.6320, 10.6420, 10.6520, 10.6620, 10.6720, 10.6820, 10.6920, 10.7020, 10.7120, 10.7220, 10.7320, 10.7420, 10.7520, 10.7620, 10.7720, 10.7820, 10.7920, 10.8020, 10.8120, 10.8220, 10.8320, 10.8420, 10.8520, 10.8620, 10.8720, 10.8820, 10.8920, 10.9020, 10.9120, 10.9220, 10.9320, 10.9420, 10.9520, 10.9620, 10.9720, 10.9820, 10.9920, 11.0020, 11.0120, 11.0220, 11.0320, 11.0420, 11.0520, 11.0620, 11.0720, 11.0820, 11.0920, 11.1020, 11.1120, 11.1220, 11.1320, 11.1420, 11.1520, 11.1620, 11.1720, 11.1820, 11.1920, 11.2020, 11.2120, 11.2220, 11.2320, 11.2420, 11.2520, 11.2620, 11.2720, 11.2820, 11.2920, 11.3020, 11.3120, 11.3220, 11.3320, 11.3420, 11.3520, 11.3620, 11.3720, 11.3820, 11.3920, 11.4020, 11.4120, 11.4220, 11.4320, 11.4420, 11.4520, 11.4620, 11.4720, 11.4820, 11.4920, 11.5020, 11.5120, 11.5220, 11.5320, 11.5420, 11.5520, 11.5620, 11.5720, 11.5820, 11.5920, 11.6020, 11.6120, 11.6220, 11.6320, 11.6420, 11.6520, 11.6620, 11.6720, 11.6820, 11.6920, 11.7020, 11.7120, 11.7220, 11.7320, 11.7420, 11.7520, 11.7620, 11.7720, 11.7820, 11.7920, 11.8020, 11.8120, 11.8220, 11.8320, 11.8420, 11.8520, 11.8620, 11.8720, 11.8820, 11.8920, 11.9020, 11.9120, 11.9220, 11.9320, 11.9420, 11.9

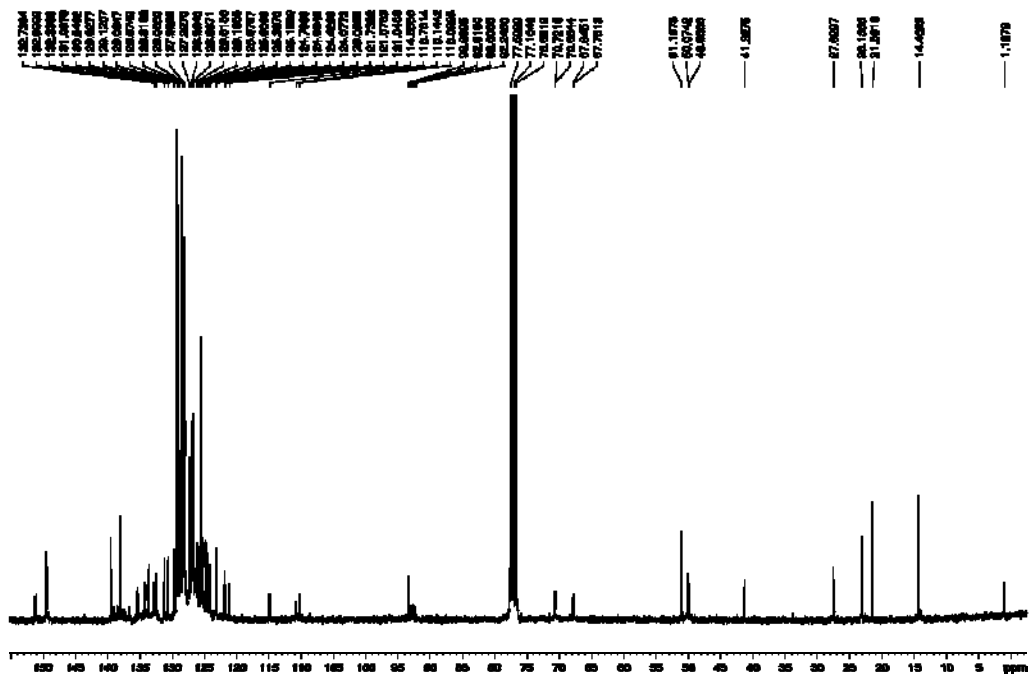

$(R_{Ru}, R_{ax})$ -[RuCl(Ind)(PPh<sub>3</sub>)(6)(C≡C-CPh<sub>2</sub>C≡CPh)], [( $R_{Ru}, R_{ax}$ )-**16**]

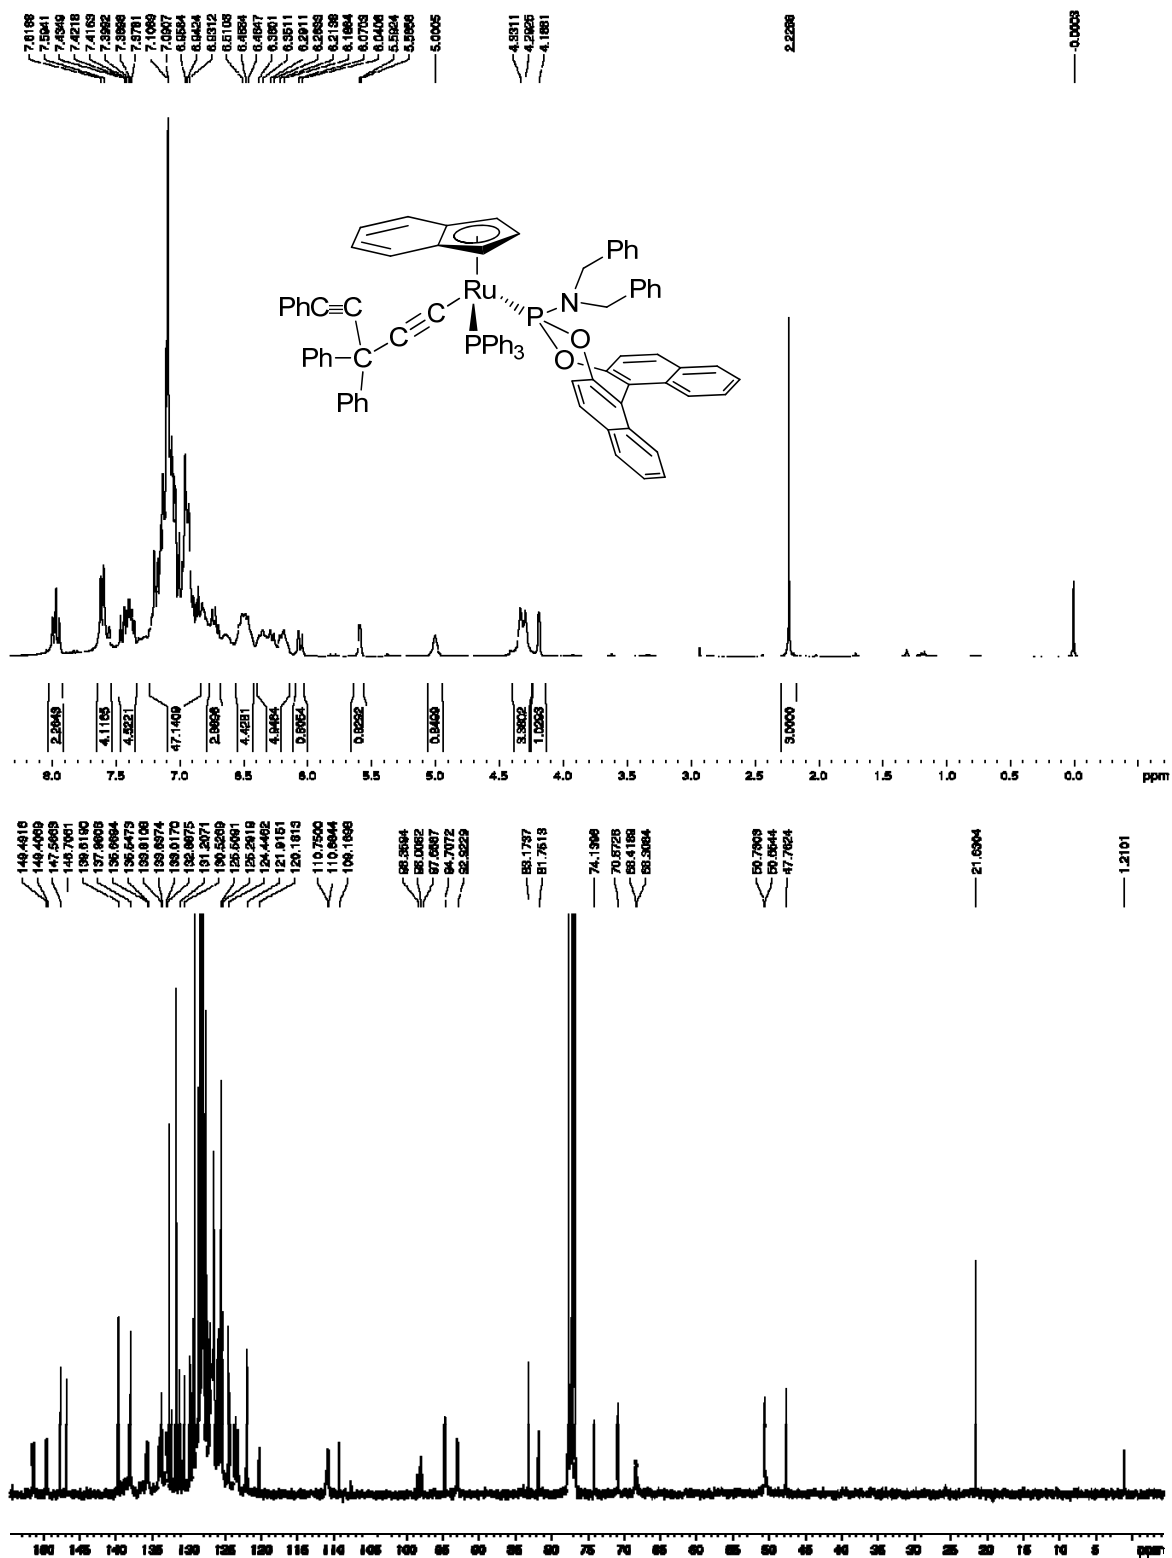

$(R_{Ru}, R_{ax})$ -[RuCl(Ind)(PPh<sub>3</sub>)(6)]{C≡C-CPh<sub>2</sub>CH<sub>2</sub>C(O)Ph}, [( $R_{Ru}, R_{ax}$ )-17]

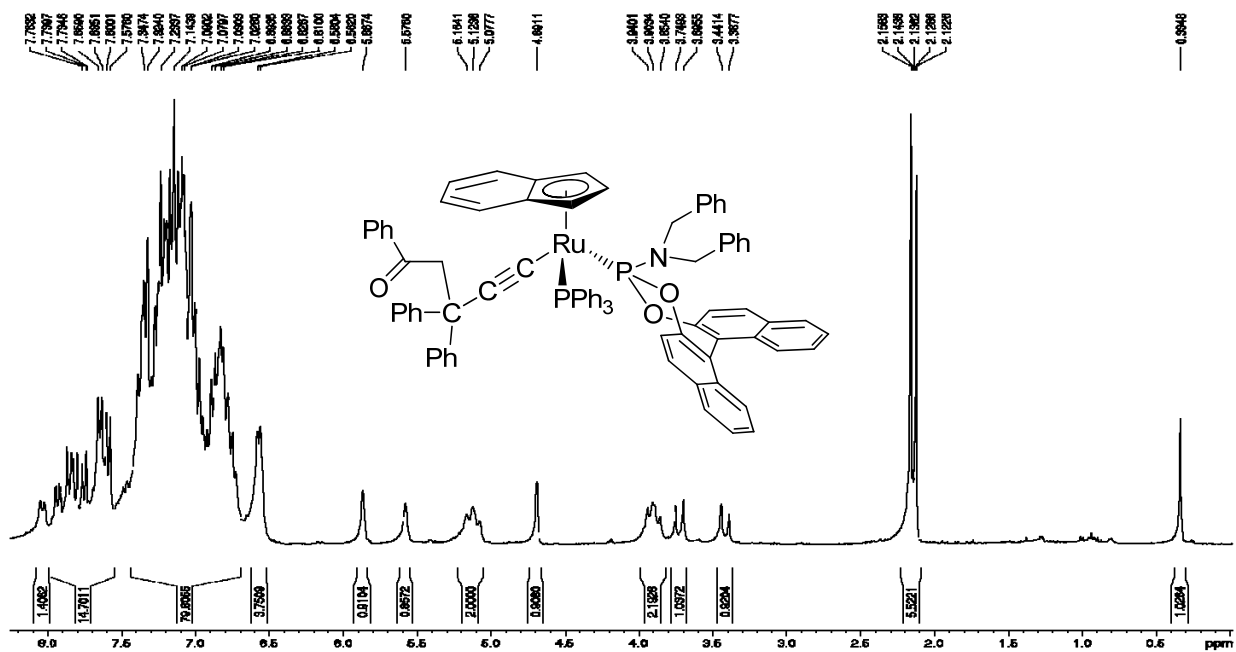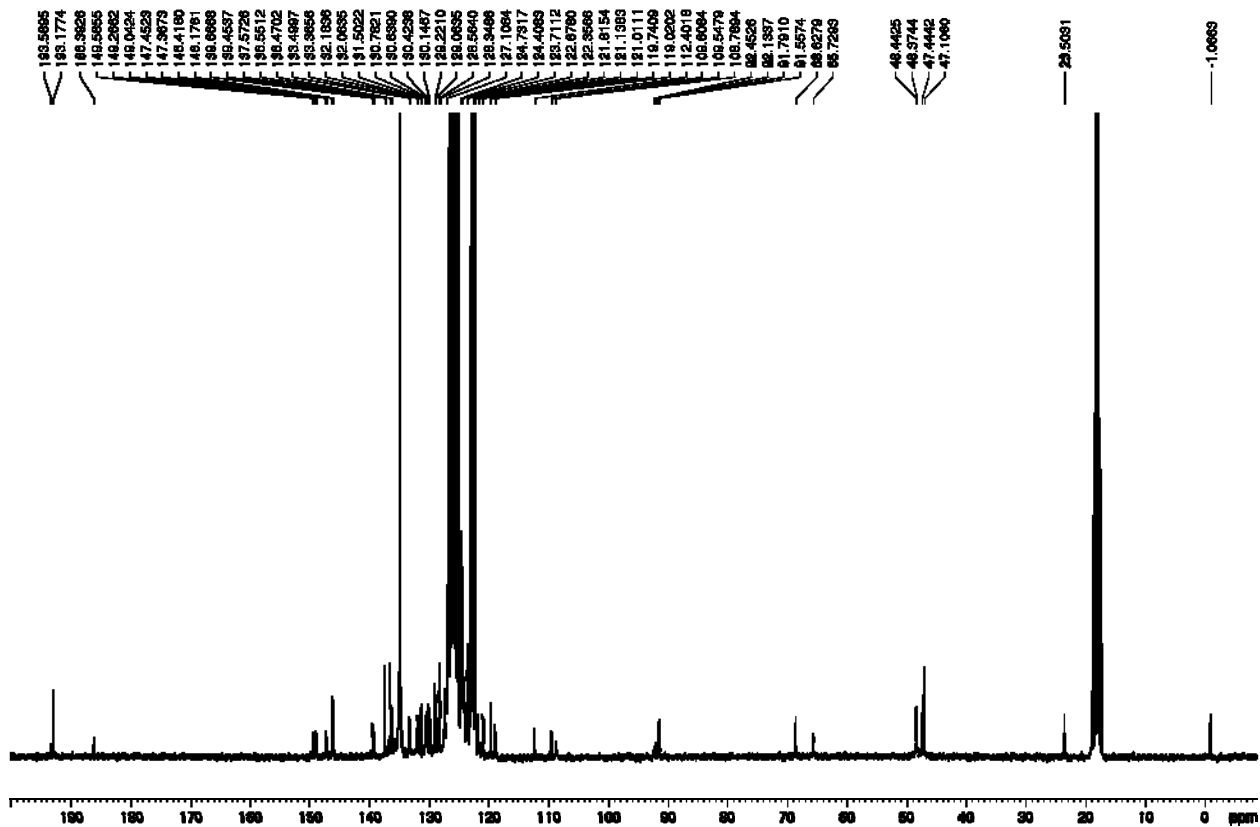

$(R_{Ru}, R_{ax})$ -[Ru(Ind)(PPh<sub>3</sub>)(**6**){C≡C-C(*t*-Bu)(2-naphthyl)CH<sub>3</sub>}], [(*R*<sub>Ru</sub>, *R*<sub>ax</sub>)-**18**]

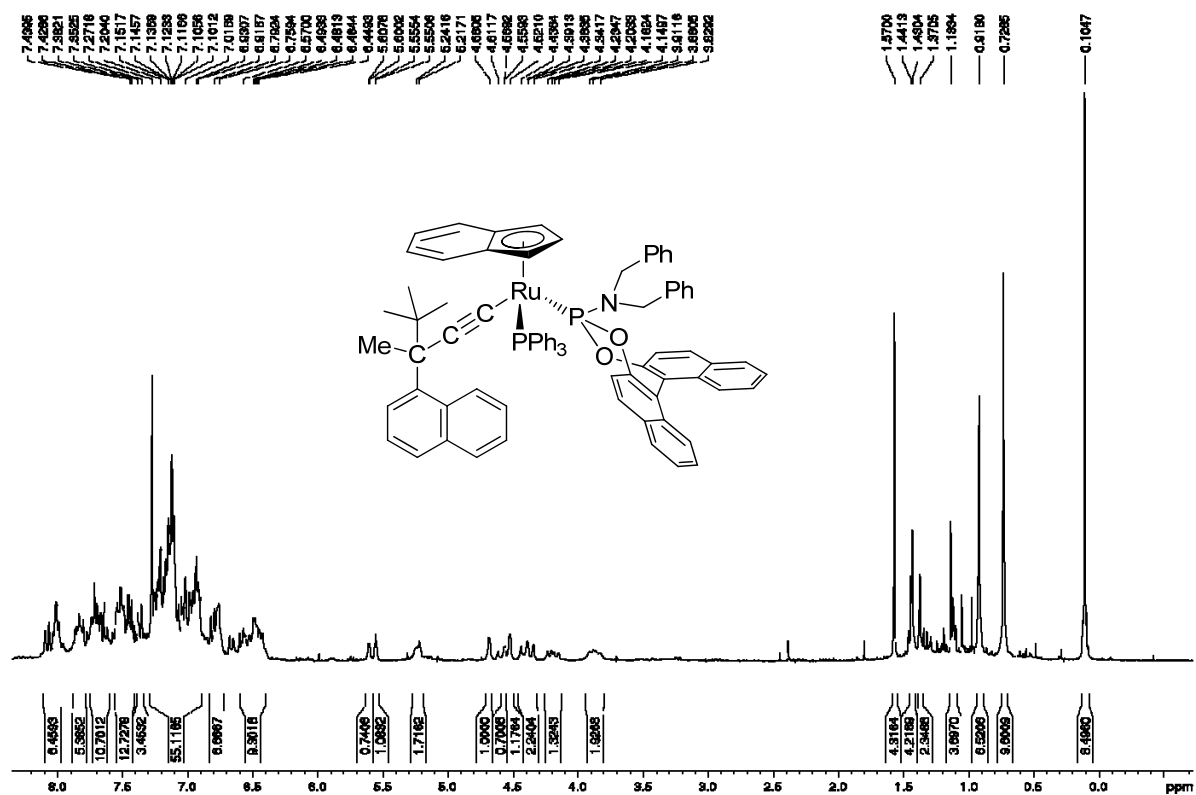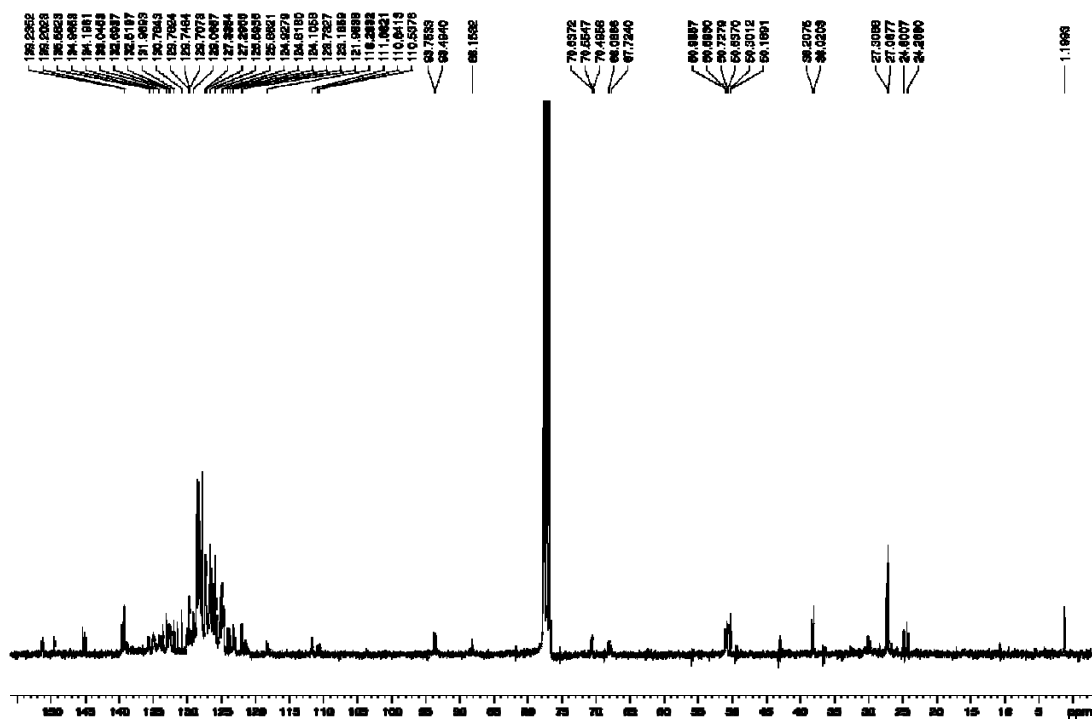

$(R_{Ru}, R_{ax})$ -[Ru(Ind)(PPh<sub>3</sub>)(**6**){C≡C-C(*t*-Bu)(2-naphthyl)C≡CPh}], [( $R_{Ru}, R_{ax}$ )-**19**]

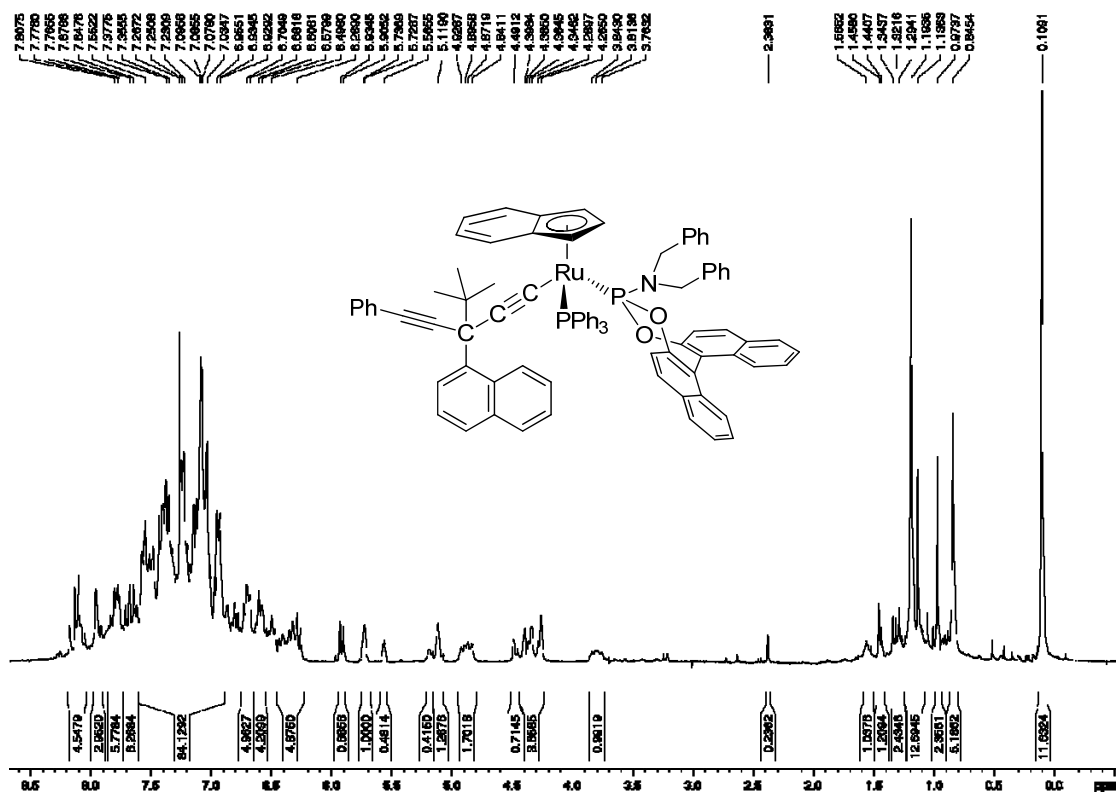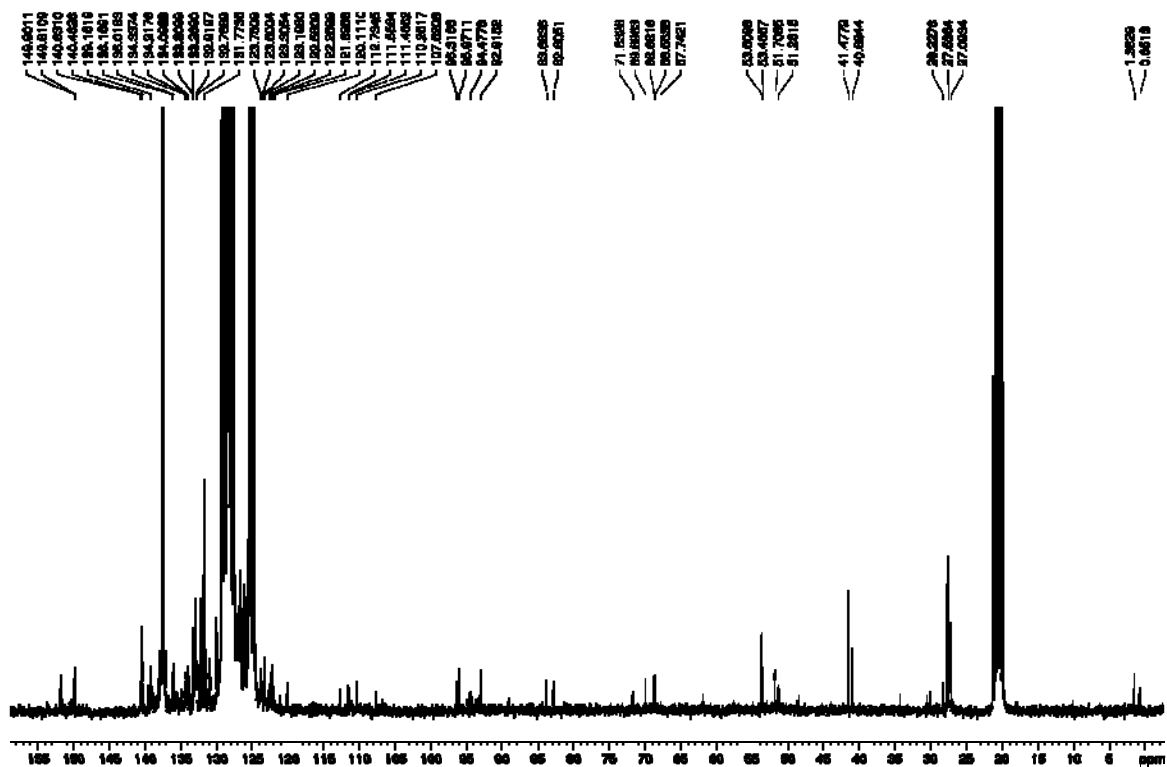

$(R_{Ru}, R_{ax})$ -[Ru(Ind)(PPh<sub>3</sub>)(**6**){C≡C-C(*t*-Bu)(2-naphthyl)CH<sub>2</sub>C(O)Ph}], [( $R_{Ru}, R_{ax}$ )-**20**]

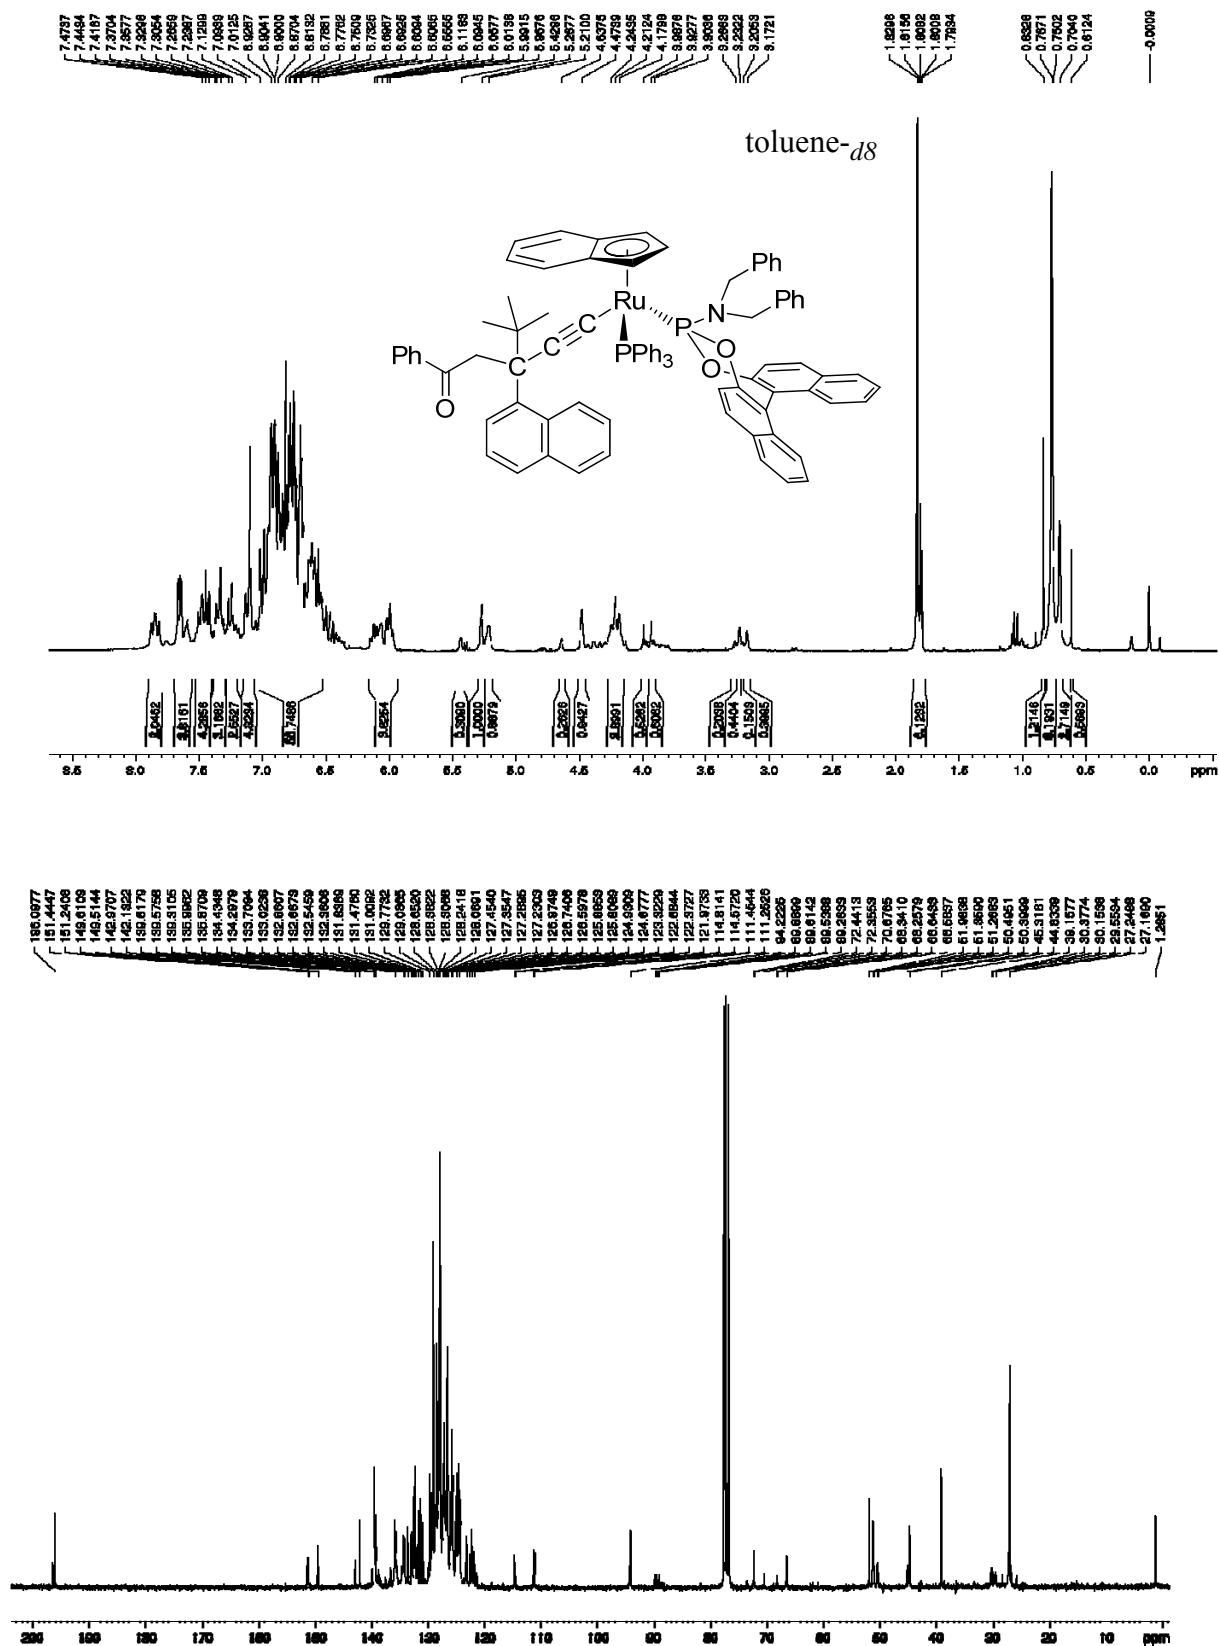

Supplement: Supplementary file 1 [file 3882358]
